# Supplementary material for: A metagenomic collection of 19,778 viruses reveals the diverse virome of the chicken gut
Source: Research Square preprint supplement (doi:10.21203/rs.3.rs-6671648/v1), 2025-06-10
Supplement: Supplementary file 1 [file 0606ad123979596afc15c537.pdf]

## **SUPPLEMENTARY MATERIAL**

### **A metagenomic collection of 19,778 viruses reveals the diverse virome of the chicken gut**

**Johan S. Sáenz<sup>1,2</sup>, Timur Yergaliyev<sup>1,2</sup>, Bibiana Rios-Galicia<sup>1,2</sup>, Jana Seifert<sup>1,2</sup> & Amelia  
Camarinha-Silva<sup>1,2</sup>**

<sup>1</sup>Institute of Animal Science, University of Hohenheim, Emil-Wolff-Str. 6-10, 70599 Stuttgart, Germany

<sup>2</sup>HoLMiR—Hohenheim Center for Livestock Microbiome Research, University of Hohenheim, Leonore-Blosser-Reisen Weg 3, 70599 Stuttgart, Germany

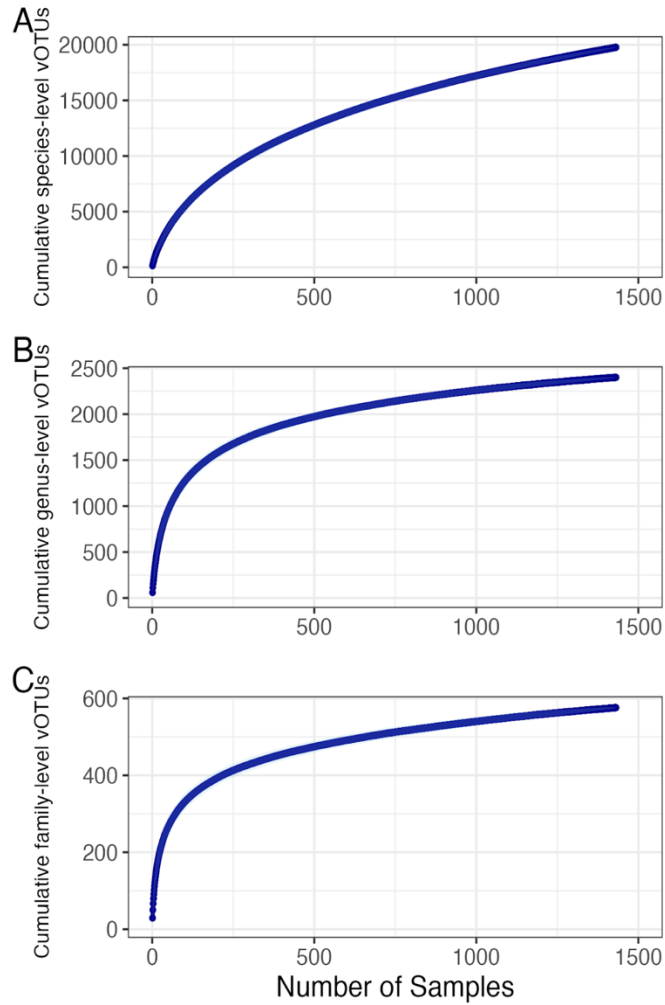

**Figure S1. Saturation curves of viral diversity across taxonomic levels.** Accumulation curves show the cumulative number of viral operational taxonomic units (vOTUs) detected at the species (A), genus (B), and family (C) levels as a function of the number of metagenomic samples analyzed.

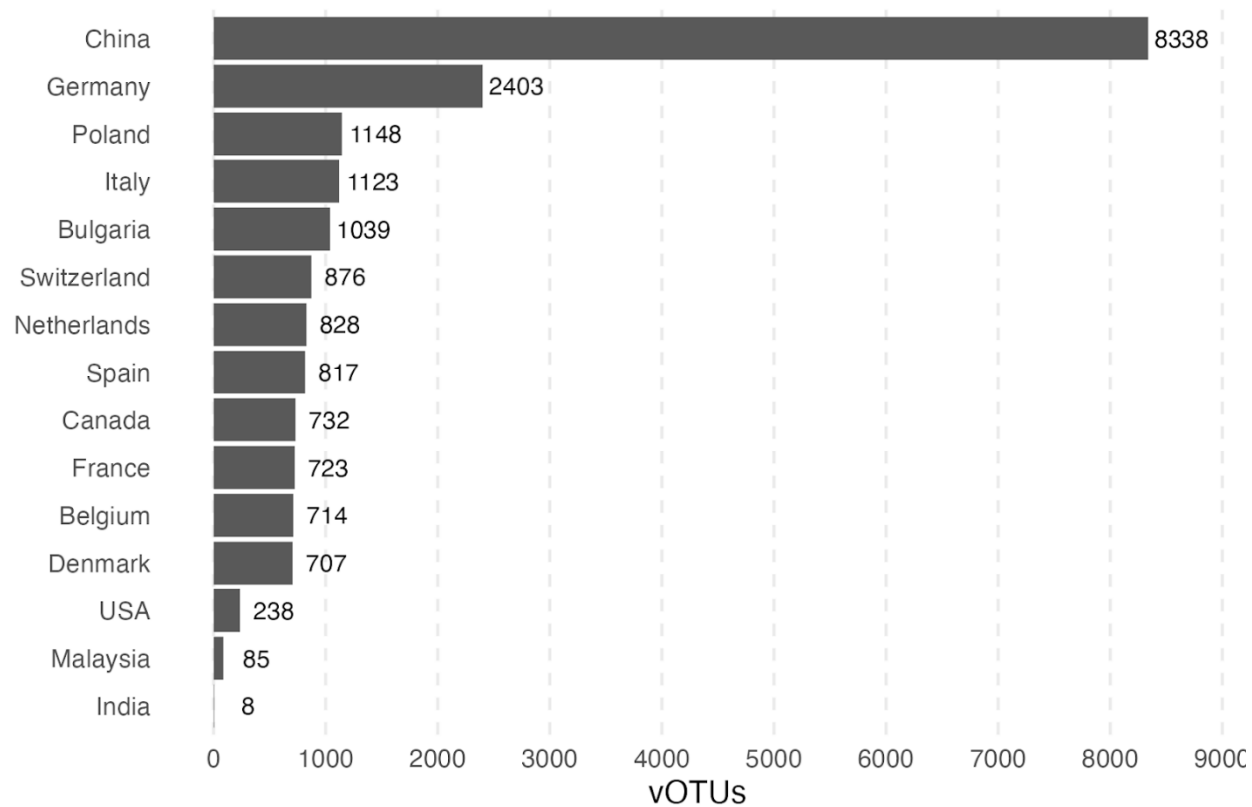

**Figure S2. Number of species-level vOTUs (n=19778) mined per country of sample origin.**

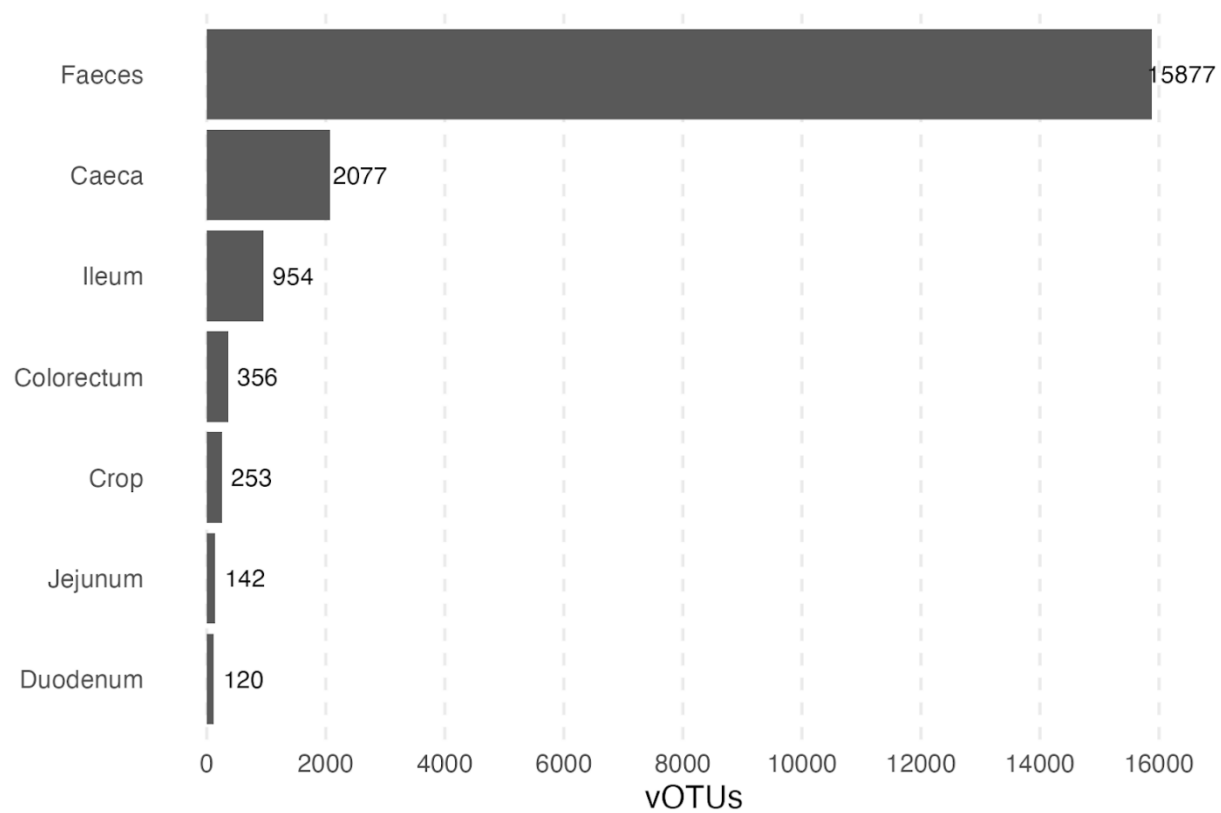

**Figure S3. Number of species-level vOTUs (n=19778) mined per gastrointestinal region.**

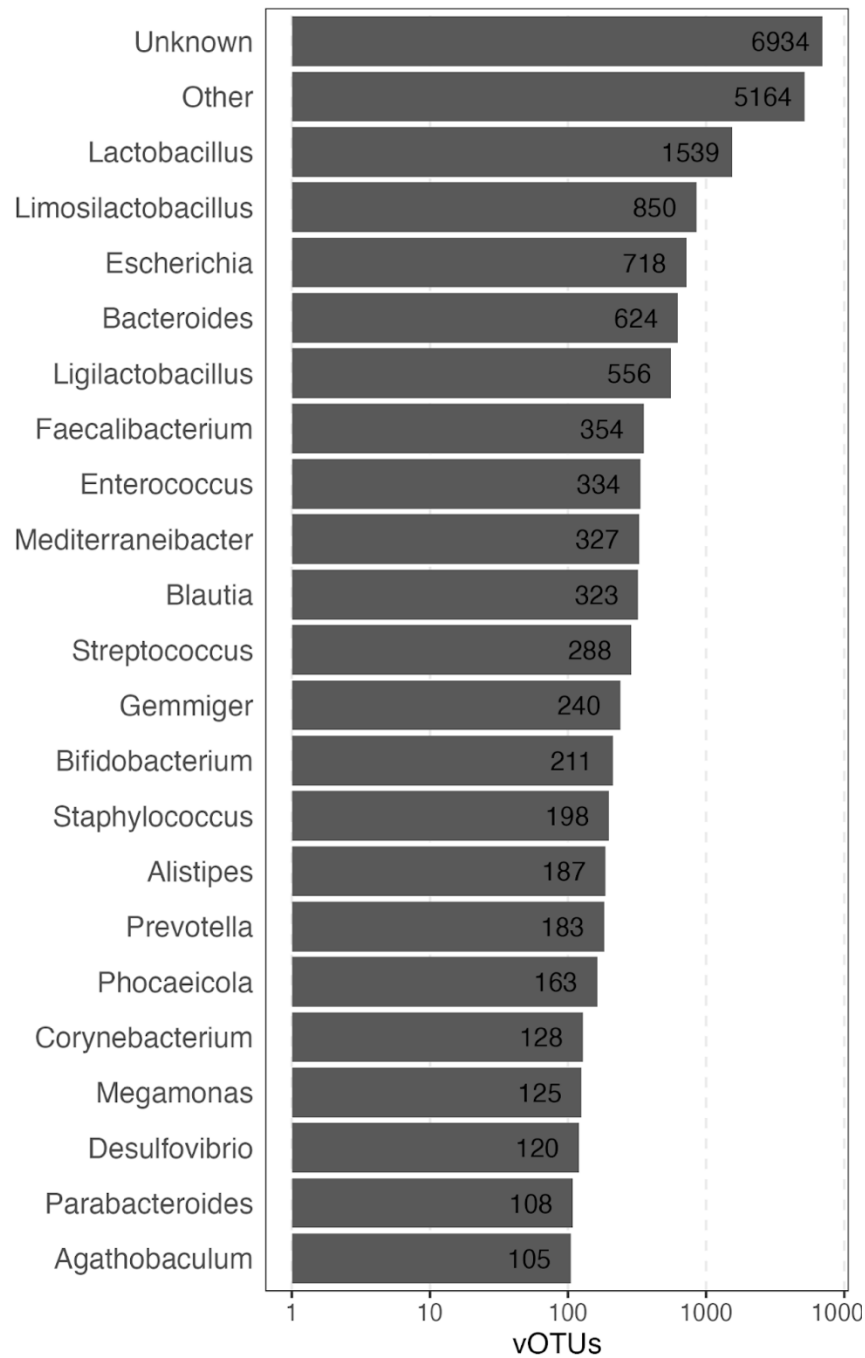

**Figure S4. Number of species-level vOTUs linked to a host, at genus levels, using Integrated Phage HOst Prediction (iPHoP).**

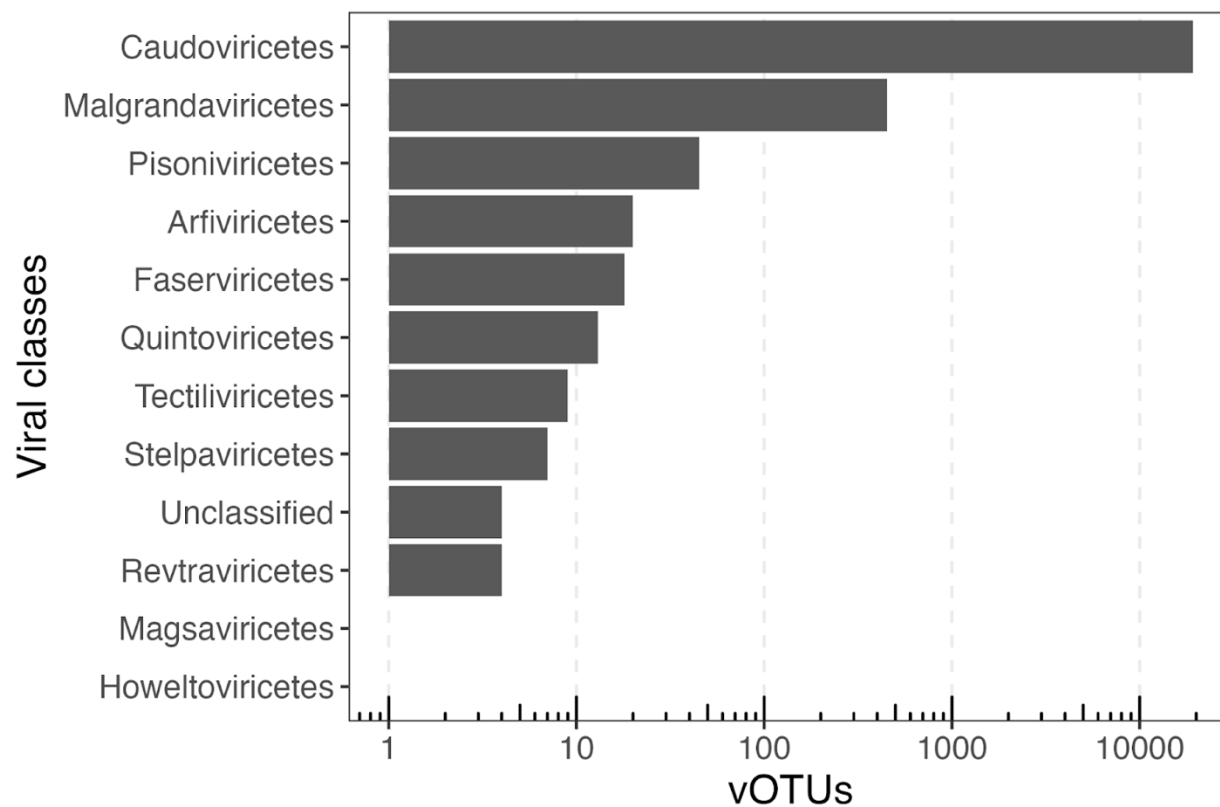

**Figure S5. Number of species-level vOTUs by predicted viral class. X-axis is depicted in logarithmic scale.**

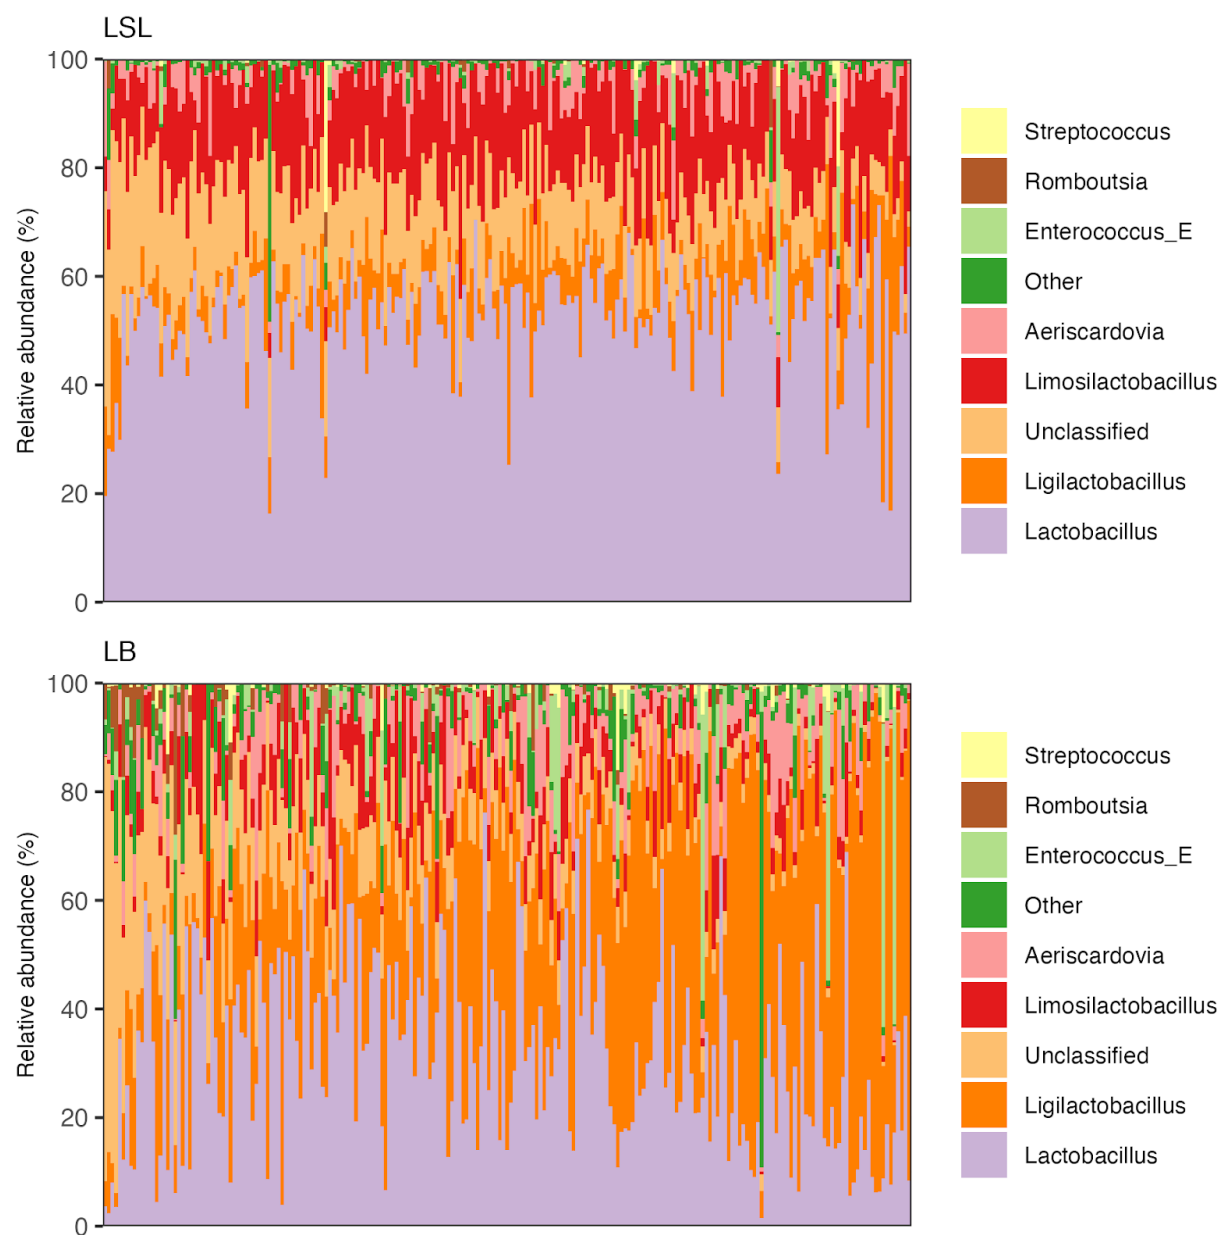

**Figure S6. Abundance of vOTUs by host across 435 samples of two distinct chicken breeds, LSL (n=216) and LB (n=219).**
